# Supplementary material for: Causal relationship between gut microbiome and risk of AMD: a two-sample Mendelian Randomization study
Source: Research Square preprint supplement (doi:10.21203/rs.3.rs-3097550/v1), 2023-08-04
Supplement: Supplementary file 1 [file 65e7563295c3484eaaf515c6.xlsx]

## Sheet: Table1
Table 1 Significant Mendelian randomization estimates from gut microbiota on AMD
Circulating proteins	methods	OR (95% Confidence intervals)	P value	Cochran's Q-derived P value	MR-Egger intercept-derived P value
genus_Candidatus_Soleaferrea	MR Egger	0.93 (0.23-3.68)	0.915052
	Weighted median	0.8 (0.67-0.95)	0.00977001
	Inverse variance weighted	0.81 (0.71-0.93)	0.00204862	0.965926	0.856429
genus_Faecalibacterium	MR Egger	1.16 (0.83-1.61)	0.411366
	Weighted median	1.25 (0.98-1.59)	0.0716317
	Inverse variance weighted	1.34 (1.13-1.59)	0.000755865	0.374092	0.341912
